# Supplementary material for: Synthesis, structure, and extraction behavior of 4,5′,4″,5‴-tetra-tert-butyltetrabenzo-24-crown-8 †‡
Source: Royal Society of Chemistry journal article supplement (doi:10.1039/b008603g), 2001-01-01
Supplement: b008603g.doc [file b008603g.doc]

# Supplementary data

Synthesis, structure, and extraction behavior of

4,5’,4”,5”’-tetra(*t*-butylbenzo)-24-crown-8

Tatiana Levitskaia, Richard A. Sachleben, Jeffrey C. Bryan, and Bruce A. Moyer*

Chemical and Analytical Sciences Division, Oak Ridge National Laboratory,

MS-6119/4500S, Oak Ridge, Tennessee 37831, U.S.A.

Parameters Used in SXLSQI19 Modeling

|  | Masson Coefficients*a* | | | |
| --- | --- | --- | --- | --- |
| Ion | | *V*0  cm3 mol-1 | *S*V*  cm3 L1/2 mol –3/2 |  |
| Cs+ | 21.29 | | 1.393 |  |
| ClO4- | 44.38 | | -0.057 |  |
| NO3- | 29.33 | | 0.543 |  |
|  | Pitzer Parameters*b* | | | |
| Interaction | (0) | | (1) |  |
| Cs+ - ClO4- | -0.1652*c* | | -0.150*c* | 2.0*c* |
| Cs+ - NO3- | -0.0758*d* | | -0.0669*d* | 2.0*d* |
|  | Other Parameters | | | |
| Species | | *V*0*e*  cm3 mol-1 | *h*  J1/2 cm-3/2 |  |
| 1,2-DCE | 79.4*f* | | 20.3*f* |  |
| 4,5’,4”,5”’-tetra-  *t*-butylbenzo-  24-crown-8 | 634.0*g* | | 20.15*g* |  |
| Cs+ | 21 | | 14.0*i* |  |
| ClO4- | 44 | | 25.8*i* |  |
| NO3- | 29 | | 25.8*i* |  |

*a*Masson coefficients allow the aqueous density to be estimated for molality-molarity interconversions. Values were taken from ref. 29. *b*Pitzer parameters allow aqueous-phase ionic activity coefficients to be estimated. *c* Values were taken from ref. 27. *d* Taken from ref. 21.
e Molar volume of the species in the organic phase. Values for the inorganic ions were taken to be approximately equal to *V*0. *f* Taken from ref. 22. *g*Estimated according to group contributions as described in ref. 22. *h* Hildebrand solubility parameters were used in estimation of the activity coefficients of organic-phase species. The solubility parameter of a complex was taken as the volume-weighted average of the solubility parameters of its constituents. For example, (*V*MM + *V*BB)/(*V*M + *V*B).19 *i* Taken from ref. 28.
